# Supplementary material
Source: HighWire-hosted journal article supplement (http://erj.ersjournals.com/highwire/filestream/113608/field_highwire_adjunct_files/0/supplemental_files.pdf)
Supplement: supplemental_files.pdf [file supplemental_files.pdf]

## Supplemental files

### **Association of Kco with emphysema progression and lung function decline in heavy smokers**

**Firdaus A.A. Mohamed Hoesein, MD; Pieter Zanen, MD, PhD; Bram van Ginneken, MSc, PhD; Rob J. van Klaveren, MD, PhD; Jan-Willem J. Lammers, MD, PhD**

#### **Results with using %950 HU as emphysema severity measurement**

Baseline median (inter quartile) %950 was 8.7% (4.5-15). Kco at baseline significantly ( $p=0.004$ ) correlated with %950 at baseline,  $r = -0.13$ .

Follow-up median (inter quartile) %950 was 14.23% (7.4-19.7). The statistical model explained 73% of the variance in %950 after follow-up. The significant covariates and their estimated effects are listed in Tables S1 and S2.

**Table S1.** Results from the multiple linear regression analyses showing the estimated effects of baseline Kco and other significant covariates on %950 after follow-up.

| Estimated effects of changes in parameters on %950 in % after follow-up |                          |                    |               |         |
|-------------------------------------------------------------------------|--------------------------|--------------------|---------------|---------|
| Covariate                                                               | Increment or comparison  | Change in %950 (%) | CI95%         | p-value |
| Kco baseline                                                            | 0.25 decrease            | +0.65 %            | 0.2 – 1.1     | 0.01    |
| Baseline FEV <sub>1</sub> /FVC [%]                                      | 1% decrease              | +0.14 %            | 0.08 – 0.19   | <0.001  |
| Smoking status                                                          | Current versus ex-smoker | -1.2 %             | -2.0 – -0.30  | 0.012   |
| Baseline %950                                                           | 1% increase              | +0.77 %            | -0.61 – -0.72 | <0.001  |
